# Supplementary material
Source: PubMed Central journal article supplement (PMC4978123)
Supplement: NIHMS805237-supplement-1.pdf [file NIHMS805237-supplement-1.pdf]

# THE LANCET

## **Supplementary appendix**

This appendix formed part of the original submission and has been peer reviewed. We post it as supplied by the authors.

Supplement to: Heath GW, Parra DC, Sarmiento OL, et al, for the Lancet Physical Activity Series Working Group. Evidence-based intervention in physical activity: lessons from around the world. *Lancet* 2012; published online July 18. [http://dx.doi.org/10.1016/S0140-6736\(12\)60816-2](http://dx.doi.org/10.1016/S0140-6736(12)60816-2).

1  
2  
3  
4  
5  
6  
7  
8  
9  
10  
11  
12  
13  
14  
15  
16  
17  
18  
19  
20  
21  
22  
23

**PHYISCAL ACTIVITY 3  
WEB APPENDICES**

24  
25  
26  
27  
28  
29  
30  
31  
32  
33  
34  
35  
36  
37  
38  
39  
40  
41

**Table of Contents**

**Page(s)**

Section 1: Search Methods .....3

Section 2: Map of International Physical Activity and Public Health Courses.....4

Section 3: Effective Physical Activity Intervention Case Studies.....5-6

Section 3: Summary Review Evidence Table.....7-19

42 **Systematic review of reviews search methods (see summary table 1)**

43

44 We conducted a systematic search to identify the latest reviews of the literature regarding interventions to  
45 increase physical activity in order to provide input for a simulation model of physical activity interventions  
46 and megatrends (Web Summary Review Evidence Table 1). We used the following electronic databases,  
47 websites, and published sources for our search: Clinical Evidence, Cochrane Library, Centre for reviews  
48 and dissemination (DARE admin database, HTA, NCCHTA), EMBASE, National Guidelines  
49 Clearinghouse, MEDLINE, PUBMED, NICE, PsycINFO, SIGLE, Sociological Abstracts, and TRIP. We  
50 searched the databases for systematic reviews or meta-analyses related to interventions and physical  
51 activity in human subjects, published from January 1 2001 to July 31 2011 and PUBMED from January 1  
52 2000 to December 20 2011 (see Pratt et al paper of this series appendix). Reviews were classified  
53 according to setting and type of intervention (clinical, community, schools, workplace, or other). We  
54 analyzed 100 reviews of physical activity interventions (see Pratt et al.,<sup>1</sup> Web Appendix). Five systematic  
55 reviews were reviews-of-reviews, 19 were meta-analyses, and 76 were narrative reviews that did not  
56 provide quantitative effect estimates results from pooled effects or meta-regressions. Eighteen reviews  
57 covered interventions in clinical settings, 14 described community settings, 5 covered school settings, five  
58 described workplace settings, and the remaining reviews included multiple settings or reported not having a  
59 setting restriction (table 1). Sixty reviews included studies conducted only in high-income countries, while  
60 only eight included studies conducted in low and middle income countries; 32 reviews did not include  
61 country specific information. Fifty reviews included studies of adults; 19 of children and adolescents; 11 of  
62 adults and children; three of older adults; 13 of any age group; and four did not specify the age group. Five  
63 reviews focused only on minorities including Latino women, African American, and low socioeconomic  
64 (SES) populations; 43 reported studies that included minority groups such as African American, Hispanic,  
65 Native Americans, Asian immigrants, Pacific Islanders immigrants, individuals living in rural areas, and  
66 populations from low SES; 52 did not specify whether studies did or did not include minority populations.

- 67 • **DARE and HTA** searched September 14 2011 (limited from January 2001 to July 3, 2011)
- 68 • **The Cochrane Library** searched September 14 2011 (limited from 2001 to 2011)
- 69 • **Trip** searched September 14 2011 (limited from 2001 to 2011)
- 70 • **SIGLE (OpenGrey)** searched September 14 2011 (limited from 2001 to 2011)
- 71 • **National Guidelines Clearinghouse** searched September 14 2011 (limited from 2001 to 2011)
- 72 • **APA** (includes Psycinfo, Psycbooks, Psycarticles) searched September 14 2011 (limited from 2001 to  
73 2011)
- 74 • **PUBMED (Medline)** searched until December 20 2011

75

76 Figure 1: Number of physical activity and public health courses and/or workshops conducted over the past  
77 10 years by country income level.

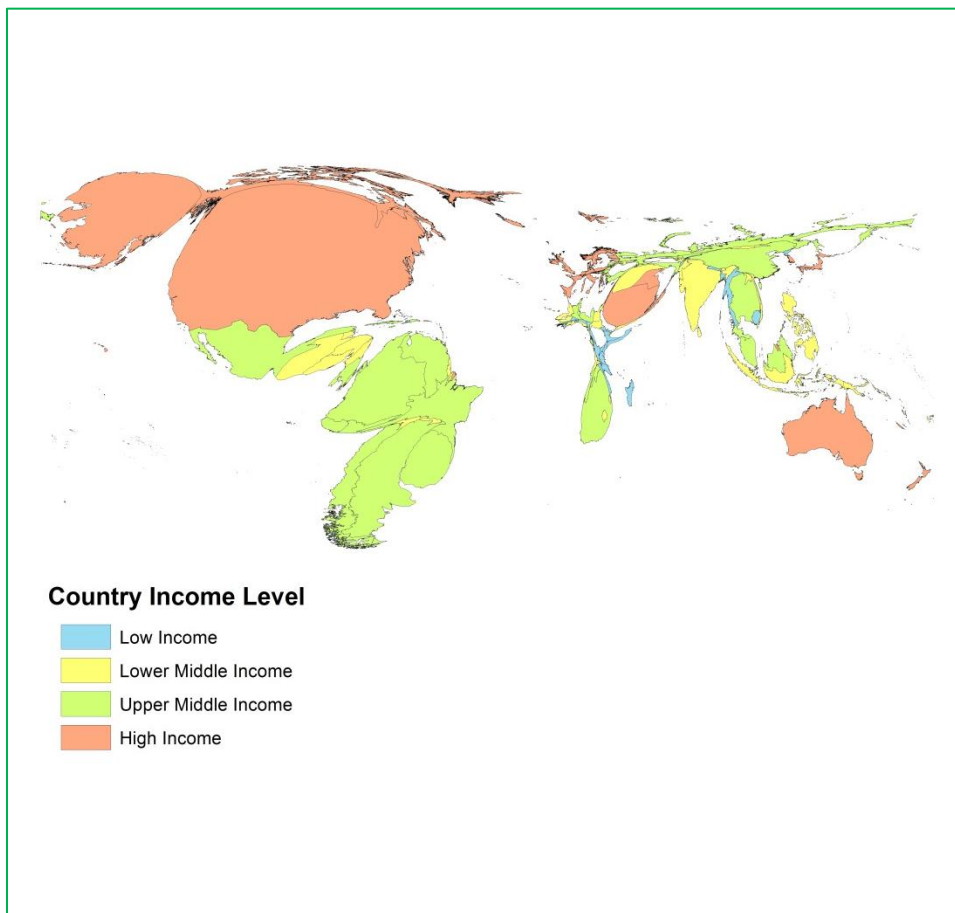

78  
79  
80  
81 Each country in this density-equalising map is resized according to the number of public health courses  
82 and/or workshops conducted over the past 10 years with the Gastner and Newman algorithm. <sup>2</sup>  
83  
84

85 **Effective Physical Activity Intervention Case Studies**

86  
87 Case Study #1: An environmental intervention in Odense Cycle City, Denmark. In a four-year period (1999  
88 – 2003) the City of Odense, Denmark, made 50 different interventions to promote commuter cycling.<sup>3,4</sup>  
89 Interventions included changes of the environment, traffic rules and campaigns. The total price invested  
90 during the four years was \$4M. Environmental changes included a) new bike lanes on main roads, b) bike  
91 lanes in 20 right turns were changed so that cyclists could turn before the actual cross, and so they did not  
92 have to stop at traffic lights, c) bike lanes in 5 T-crosses were changed so that cyclists could pass without  
93 stopping for a traffic light, d) traffic lights were synchronized, so that cyclists cycling at 22 km/h or more  
94 would hit a green light. For this 6 Doppler radar sites were installed, which measured the speed of cyclists,  
95 e) stop signs were set up for cars giving cyclists priority in crossings, f) lockers for bikes were installed at  
96 the central railway station and shelters for 2000 bikes were built around the city. In addition, street lights  
97 were installed on bike lanes where needed. Other interventions included city employees cycling around the  
98 city taking photographs of bike lanes to identify places where maintenance was necessary coupled with an  
99 increase in the municipality budget for maintenance of the lanes. Cyclists could send SMS to the  
100 municipality to report poor bike lanes. Installation of 16 electronic trip counters showed how many bikes  
101 had passed on a daily, weekly, monthly, and yearly basis. These counts were also used in the evaluation of  
102 the intervention in terms of increased number of trips. Additionally, high pressure bike pumps were placed  
103 beside the electronic counters. An internet page was constructed where cyclists could plan the fastest, the  
104 shortest or the most appealing route. The project was evaluated in 2003 after four years of intervention by  
105 comparing the number of trips in the city with trends in other major cities in Denmark. Further, hospital  
106 records including accidents that involved cyclists were obtained. During the four years of the intervention  
107 the number of cycle trips increased gradually by 20%, while the number of cycle trips decreased slightly in  
108 the rest of the country. A 20% decrease was found in the number of accidents involving cyclists. This  
109 decrease may partly be due to safer bike lanes and higher awareness of drivers. Perceived safety was  
110 evaluated via questionnaire; both cyclists and drivers reported feeling safer than before the intervention.  
111 The mean cycle commuter speed increased by 2% and the commuter cyclists experienced 15% fewer stops.

112  
113 Case Study #2: Kinder-Sportstudie (KISS) School-based Intervention – Switzerland. The Kinder-  
114 Sportstudie (KISS) is a randomized school-based physical activity program among 1st and 5th grade  
115 children.<sup>5</sup> The intervention was targeted at both the cluster and the individual level with the aim of  
116 increasing daily physical activity. Children in both groups had three physical education (PE) lessons each  
117 week. The intervention group had two additional physical education lessons on the remaining school days.  
118 A team of expert PE teachers prepared all five PE lessons for the children in the intervention group. The  
119 three compulsory 45 minutes of weekly PE lessons were delivered by regular classroom teachers according  
120 to the specified curriculum, whereas the two additional weekly 45 min lessons were taught by PE teachers  
121 mostly outdoors. In addition, three to five short activity breaks (two to five minutes each) during academic  
122 lessons—comprising motor skill tasks such as jumping or balancing on one leg, power games, or  
123 coordinative tasks—were introduced every day. Further, children received daily physical activity  
124 homework of about 10 minutes' duration. This included aerobic, strength, or motor skill tasks. Children and  
125 parents in the control group were not informed about the existence of the intervention program in other  
126 schools. The teachers in the control group knew about the intervention arm but were not informed about its  
127 content. No incentives for participating in the study were offered to the children. Mean age was 6.9 (SD  
128 0.3) years for first grade, and 11.1 (0.5) years for fifth grade children. After adjustment for grade, sex,  
129 baseline values, and clustering within classes, children in the intervention arm compared with controls  
130 showed significant reductions in measures of fatness determined through skinfolds, increased aerobic  
131 fitness, increased moderate-vigorous physical activity in school, all day moderate-vigorous physical  
132 activity, total physical activity in school and overall. In addition, other biological risk factors for the  
133 development of chronic disease such as HDL, glucose and triglycerides, improved significantly. This  
134 school based multi-component physical activity intervention including compulsory elements improved  
135 physical activity and fitness and reduced adiposity in children.

136  
137 Case Study #3: Effects of “10,000 Steps Ghent”: A Whole-Community Intervention. Currently there is a  
138 great deal of interest in multi-component community-based approaches directed towards changing physical  
139 activity or health behaviors. The opportunity to objectively assess the impact of multiple and synergistic

140 intervention strategies, including policy, environmental, social, and behavioral approaches was provided  
141 with the initiation of the “10,000 Steps Ghent” project. A multi-component community-based intervention  
142 was implemented in 2005 with follow-up measurements in 2006 to promote physical activity among adults  
143 living in the city of Ghent, Belgium.<sup>6</sup> The intervention components included the following: A local media  
144 campaign where press conferences were organized at the beginning of the project and six other times  
145 throughout the intervention, along with newspaper coverage, mailed periodicals, newscasts, and billboards;  
146 a website was created to provide information about the project along with physical activity and health  
147 messages and tips on physical activity and commonly asked questions and answers; environmental  
148 approaches which included street signage identifying walkable distances and destinations; the sale and loan  
149 of pedometers along with a booklet with “how-to” information and a step-count log available at a variety of  
150 retail outlets including sporting goods stores, pharmacies, health insurance companies, schools, and  
151 recreational/sport centers; workplace physical activity program kits were made available to  
152 health/personnel departments of all companies; programming targeting older adults in community centers  
153 and the local town park; dissemination of information such as flyers, posters, and information about the  
154 pedometer sale/loan to schools, health care providers, associations, and societies. In 2005, 872 randomly  
155 selected subjects (aged 25 to 75), from the intervention community (Ghent) and 810 subjects from a  
156 comparison community, participated in the baseline measurements. Of these, 660 intervention subjects and  
157 634 comparison subjects completed the follow-up measurements in 2006. After one year of intervention  
158 there was an increase of 8% in the number of people reaching the “10,000 steps” standard in Ghent,  
159 compared with no increase in the comparison community. Average daily steps increased by 896 in the  
160 intervention community versus no increase in the comparison community. Results are supported by self-  
161 reported measures of physical activity as assessed by the International Physical Activity Questionnaire  
162 (IPAQ). The “10,000 steps/day” message successfully reached the Ghent population as evidenced by an  
163 increase in pedometer-determined physical activity levels following 1 year of multi-component  
164 interventions. These results support the practice of combining policy and environmental approaches to  
165 promoting physical activity, along with informational and social/behavioral approaches to ensure overall  
166 success of a community-based effort to promote physical activity.

167  
168  
169 **References:**

- 170  
171 1. Pratt M, Sarmiento OL, Ogilvie D, Marcus B, Brownson RC, Montes F. Physical Activity  
172 Interventions and Global Megatrends: What Really Matters for Changing Global Physical Activity  
173 Levels? *The Lancet*. 2012. (submitted for publication).
- 174 2. Gastner MT, Newman ME. From the cover: diffusion-based method for producing density-  
175 equalizing maps. *Proc Nat Acad Sci USA* 2004; 101: 7499–504.
- 176 3. Troelsen J, Jensen SU, Andersen T, and Edrén K. Evaluering af Odense - Danmarks nationale  
177 cykelby. *Kerteminde Tryk*. 2004:1-121. Odense, Denmark.
- 178 4. Troelsen J. [Transportation and health. Odense - The National Cycling City of Denmark, 1999-  
179 2002 ]. *Ugeskr Laeger*. 2005; 167: 1164-1166.
- 180 5. Kriemler,S, Zahner, L., Schindler, C. et al. Effect of school based physical activity programme  
181 (KISS) on fitness and adiposity in primary schoolchildren: cluster randomised controlled trial. *BMJ*. 2010; 340: c785.
- 182  
183 6. De Cocker KA, De Bourdeaudhuij IM, Brown JM, Cardon GM. Effects of “10,000 Steps Ghent” a  
184 whole-community intervention. *Am J Prev Med*. 2007; 33(6):455–463). ([www.10000stappen.be](http://www.10000stappen.be)).
- 185  
186

187  
188

**Summary Review Evidence Table 1**

| Reference                                                                                                                                                                                                         | Year of publication | Year of the systematic search | Language for the systematic search | Objective                                                                                                                                                                                              | Age group                 | Setting                                     | Type of studies reviewed                 | Countries/region of studies | Effect size estimates                                                                                                           | Type of systematic review |
|-------------------------------------------------------------------------------------------------------------------------------------------------------------------------------------------------------------------|---------------------|-------------------------------|------------------------------------|--------------------------------------------------------------------------------------------------------------------------------------------------------------------------------------------------------|---------------------------|---------------------------------------------|------------------------------------------|-----------------------------|---------------------------------------------------------------------------------------------------------------------------------|---------------------------|
| Eakin EG et al. Review of primary care-based physical activity intervention studies: effectiveness and implications for practice and future research. Journal of Family Practice. J Fam Pract. 2000;49(2):158-68. | 2000                | 1980 to 1998                  | English                            | To summarize the literature on primary care-based interventions for increasing physical activity and make recommendations for future research and for integrating successful strategies into practice. | Adults (≥ 18 years)       | Health care                                 | RCT and QE                               | NS                          | Intervention 0-11 months: SMD range= 0.003-0.26; OR range= 1.04-3.73. Intervention≥ 12 months SMD ES= 0.09; OR range= 0.09-1.39 | Narrative review          |
| Marshall SJ. The transtheoretical model of behavior change: a meta-analysis of applications to physical activity and exercise. Annals of Behavioral Medicine. 2001; 23(4) 229-246.                                | 2001                | 1983 to 2000                  | English                            | To summarize the findings from empirical applications of TTM in the physical activity domain.                                                                                                          | Adults (<25 to +55 years) | Community, health care, worksite, education | Cross-sectional cohort study, RCT and QE | USA, Canada, UK, Australia  | ES= SMD for preparation to action=0.85; SMD for precontemplation to contemplation=0.34                                          | Meta-analysis             |
| Lawlor DA. The effect of physical activity advice given in routine primary care consultations: a systematic review. J Public Health Med. 2001;23(3):219-26.                                                       | 2001                | 1966 to 2000                  | NR                                 | To determine the effect of advice given in routine primary care consultations on levels of physical activity.                                                                                          | Adults (≥ 18 years)       | Health care                                 | RCT and QE                               | USA, Australia              | NAES                                                                                                                            | Narrative review          |
| Dunn C. The use of brief interventions adapted from motivational interviewing across behavioral domains: a systematic review. Addiction. 2001; 96(12):1725-42.                                                    | 2001                | 1983 to 1999                  | English                            | To examine the effectiveness of brief behavioral interventions adapting the principles and techniques of Motivational Interviewing to four behavioral domains: substance abuse, smoking, HIV risk and  | NS                        | Health care                                 | RCT                                      | NS                          | ES range SMD=0.00 95% CI (-0.29, 0.29)-0.42 95% CI (-0.09, 0.93)                                                                | Narrative review          |

189

|                                                                                                                                                                            |      |              |         |                                                                                                                                                                                                                      |                                    |                                                                                 |                                |                              |              |                  |
|----------------------------------------------------------------------------------------------------------------------------------------------------------------------------|------|--------------|---------|----------------------------------------------------------------------------------------------------------------------------------------------------------------------------------------------------------------------|------------------------------------|---------------------------------------------------------------------------------|--------------------------------|------------------------------|--------------|------------------|
|                                                                                                                                                                            |      |              |         | diet/exercise.                                                                                                                                                                                                       |                                    |                                                                                 |                                |                              |              |                  |
| Fogelholm M. Community health-promotion interventions with physical activity: does this approach prevent obesity? Scandinavian Journal of Nutrition. 2002;46 (4): 173-177. | 2002 | Since 1990   | English | To summarize results of community interventions for prevention of cardiovascular diseases, with dietary changes and increased physical activity as target behaviours, and change in obesity as one outcome variable. | NS                                 | Community                                                                       | Cross-sectional, cohort, QE    | USA, Germany, England, Wales | NAES         | Narrative review |
| Banks-Wallace JA. Interventions to Promote Physical Activity Among African American Women. Public Health Nursing. 2002;19(5): 321-335.                                     | 2002 | 1984 to 2000 | English | To review interventions trials designed to promote increased physical activity among African American women.                                                                                                         | Adults                             | Community, health care, center based, churches, neighborhood recreation centers | RCT, QE, pre-post-test, cohort | USA                          | NAES         | Narrative review |
| Conn VS. Interventions to Increase Physical Activity Among Aging Adults: A Meta-Analysis. Ann Behav Med 2002;24(3):190-200.                                                | 2002 | 1966 to 1999 | English | To integrate primary research findings that test interventions to increase activity among aging adults.                                                                                                              | Adults (mean age 60 to 77.2 years) | Community, health care, home-based                                              | RCT, QE, pre-post-test, cohort | NS                           | ES=SMD=0.26. | Meta-analysis    |

190  
191  
192  
193  
194  
195  
196  
197



198

|                                                                                                                                         |      |              |                |                                                                                                                                                                     |                             |                                                                                                |                 |                                                                    |                                                                                                                                                                                                                                                                                                                                                                                                                                                                                                                                                                                  |                  |
|-----------------------------------------------------------------------------------------------------------------------------------------|------|--------------|----------------|---------------------------------------------------------------------------------------------------------------------------------------------------------------------|-----------------------------|------------------------------------------------------------------------------------------------|-----------------|--------------------------------------------------------------------|----------------------------------------------------------------------------------------------------------------------------------------------------------------------------------------------------------------------------------------------------------------------------------------------------------------------------------------------------------------------------------------------------------------------------------------------------------------------------------------------------------------------------------------------------------------------------------|------------------|
| Kahn EB. The effectiveness of interventions to increase physical activity. A systematic review. Am J Prev Med. 2002;22(4 Suppl):73-107. | 2002 | 1980 to 2000 | English        | To evaluate the effectiveness of various approaches to increasing physical activity: informational, behavioral and social, and environmental and policy approaches. | Children and adults         | Community, health care, schools, college, work sites, churches, community centers, environment | RCT, QE, cohort | USA, England, Scotland, Wales, Sweden, Australia, Denmark, Greece. | Point of decision prompt: Net increase range ES: 5.5%-128.6%. Community-wide campaigns: Net increase range ES: -2.9%-21.4%. School-based of class time in MVPA: Net increase range 3.3%-125.3%. Social support change in frequency of exercise or physical activity: median net :19.6% (IQ range 14.8% to 57.6%). Individually-Adapted Health Behavior Change Programs: time spent in physical activity median net increase 35.4% (IQ range, 16.7% to 83.3%). Environmental and Policy Approaches: leisure-time physical activity: median increase 2.9% (IQ range, 6.0 to 8.5%). | Narrative review |
| van der Bij AK. Effectiveness of Physical Activity Interventions for Older Adults: A Review. Am J Prev Med. 2002;22(2):120-133.         | 2002 | 1985 to 2000 | English, Dutch | To evaluate the effectiveness of physical activity interventions among older adults                                                                                 | Older adults (51-88 years). | Community, home based (residential or nursing homes), health care                              | RCT             | USA, Europe                                                        | NAES                                                                                                                                                                                                                                                                                                                                                                                                                                                                                                                                                                             | Narrative review |

199  
200

|                                                                                                                                                                                                                                                                  |      |               |                        |                                                                                                                                                           |                       |             |                                      |                                          |      |                  |
|------------------------------------------------------------------------------------------------------------------------------------------------------------------------------------------------------------------------------------------------------------------|------|---------------|------------------------|-----------------------------------------------------------------------------------------------------------------------------------------------------------|-----------------------|-------------|--------------------------------------|------------------------------------------|------|------------------|
| Smith BJ. Do primary care interventions to promote physical activity work? A systematic review of the literature. Dec 2002. Report NCPAH 03-0002. The National Institute of Clinical Studies, Melbourne, Australia. NSW Centre for Physical Activity and Health. | 2002 | Since 1966    | English                | To determine whether interventions undertaken with patients in primary care settings can be effective in increasing their physical activity participation | Adults (18-65+ years) | Health care | RCT, QE                              | UK, Sweden, USA, Australia               | NA   | Narrative review |
| Eden KB. Does counselling by clinicians improve physical activity? A summary for the U.S. Prevention Services Task Force. Annals of Internal Medicine. 2002;137(3): 208-15.                                                                                      | 2002 | 1994 to 2002. | NR                     | To determine whether counseling adults in primary care settings improves and maintains physical activity levels.                                          | Adults (18-75+ years) | Health care | RCT, QE, Case control, observational | USA, Australia, New Zealand              | NAES | Narrative review |
| Petrella RJ. Does counseling help patients get active? Systematic review of the literature. Can Fam Physician. 2002;48:72-80.                                                                                                                                    | 2002 | 1972 to 2002  | NS                     | To determine the effect of counseling patients to become more physically active.                                                                          | Adults (18-75+ years) | Health care | RCT, QE                              | USA, Australia, New Zealand, UK, Canada. | NAES | Narrative review |
| Proper KI. Effectiveness of physical activity programs at worksites with respect to work-related outcomes. Scand J Work Environ Health. 2002;28(2):75-84.                                                                                                        | 2002 | 1980 to 2000  | English, German, Dutch | To systematically review the literature on the effectiveness of physical activity programs at worksites with respect to work-related outcomes.            | Adults                | Workplace   | RCT, QE                              | NS                                       | NA   | Narrative review |

201

|                                                                                                                                                                                 |      |                     |         |                                                                                                                                                                  |                            |                                                                       |                                    |                                          |      |                  |
|---------------------------------------------------------------------------------------------------------------------------------------------------------------------------------|------|---------------------|---------|------------------------------------------------------------------------------------------------------------------------------------------------------------------|----------------------------|-----------------------------------------------------------------------|------------------------------------|------------------------------------------|------|------------------|
| Conn VS. Integrative Review of Physical Activity Intervention Research with Aging Adults. J Am Geriatr Soc. 2003;51(8):1159-68.                                                 | 2003 | 1960 to 2000        | English | To conduct an integrative review on studies that tested interventions to increase general physical activity or aerobic exercise among aging adults.              | Older adults (65-90 years) | Community, health care, home-based, senior centers, churches, library | RCT                                | NS                                       | NA   | Narrative review |
| Adams J. Are activity promotion interventions based on the transtheoretical model effective? A critical review. Br J Sports Med. 2003;37(2):106-114.                            | 2003 | 1962 to 2011        | English | To critically review published reports of transtheoretical model based, activity promotion interventions.                                                        | Adults (≥ 16 years)        | Community, health care, workplace                                     | RCT, QE, pre-post-test             | USA, UK                                  | NAES | Narrative review |
| Proper KI. The Effectiveness of Worksite Physical Activity Programs on Physical Activity, Physical Fitness, and Health. Clinical Journal of Sport Medicine. 2003;13(2):106-117. | 2003 | 1980 to 2000        | English | To critically review the literature with respect to the effectiveness of worksite physical activity programs on physical activity, physical fitness, and health. | Adults                     | Workplace                                                             | RCT, QE                            | NS                                       | NAES | Narrative review |
| Foster C. Changing the environment to promote health-enhancing physical activity. Journal of Sports Sciences. 2004; 22(8):755-76.                                               | 2004 | Up to December 2001 | English | To present the results of a systematic review of studies that used environmental interventions to increase health-enhancing physical activity.                   | Adults (≥ 18 years)        | Community, environment                                                | QE, pre-post-test, cross-sectional | UK, USA, Australia, Switzerland, Finland | NAES | Narrative review |

202

|                                                                                                                                                            |      |              |         |                                                                                                                                                                                |                                       |                                           |                                  |                                                                                        |                                                                                     |                  |
|------------------------------------------------------------------------------------------------------------------------------------------------------------|------|--------------|---------|--------------------------------------------------------------------------------------------------------------------------------------------------------------------------------|---------------------------------------|-------------------------------------------|----------------------------------|----------------------------------------------------------------------------------------|-------------------------------------------------------------------------------------|------------------|
| Ogilvie D. Promoting walking and cycling as an alternative to using cars: systematic review. BMJ. 2004 Oct. 2;329(7469):763.                               | 2004 | NS           | NR      | To assess what interventions are effective in promoting a population shift from using cars towards walking and cycling and to assess the health effects of such interventions. | All (>10 years)                       | Community, environment                    | RCT, QE, cohort, cross-sectional | UK (Scotland, England), Denmark, USA, Australia, Netherlands, Germany, Norway, Finland | Percentage share of all trips that were shifted from cars to walking and cycling=5% | Narrative review |
| Shiits MK. Goal setting as a strategy for dietary and physical activity behavior change: a review of the literature. Am J Health Promot. 2004;19(2):81-93. | 2004 | 1977 to 2003 | NR      | To estimate effectiveness of goal setting for nutrition and physical activity behavior change and investigate effectiveness of interventions containing goal setting.          | All                                   | Community, health care, workplace, school | RCT, QE, pre-experimental        | Italy, USA, Switzerland                                                                | NAES                                                                                | Narrative review |
| Jago R. Non-curricular approaches for increasing physical activity in youth: a review. Prev Med. 2004; 39(1):157-63.                                       | 2004 | 1970 to 2002 | English | To examine the effectiveness of noncurricular interventions for promoting physical activity in youth.                                                                          | Children and adolescents (5-18 years) | Community, school, summer camps           | RCT, QE                          | USA, UK, Australia                                                                     | NAES                                                                                | Narrative review |
| Goldstein MG. Multiple behavioral risk factor interventions in primary care. Summary of research evidence. Am J Prev Med. 2004;27(2 Suppl):61-79.          | 2004 | 1990 to 2004 | NS      | To review the evidence of interventions of separate or multiple risk behaviors in primary care.                                                                                | Adults                                | Health care                               | RCT, QE, observational           | NS                                                                                     | NA                                                                                  | Narrative review |

203

|                                                                                                                                                                                                                           |      |                 |         |                                                                                                                                                                                                                                   |                      |                                                         |                                         |                                                                    |                                                                                             |                   |
|---------------------------------------------------------------------------------------------------------------------------------------------------------------------------------------------------------------------------|------|-----------------|---------|-----------------------------------------------------------------------------------------------------------------------------------------------------------------------------------------------------------------------------------|----------------------|---------------------------------------------------------|-----------------------------------------|--------------------------------------------------------------------|---------------------------------------------------------------------------------------------|-------------------|
| van Sliuijs EM. Stage-based lifestyle interventions in primary care: are they effective?. Am J Prev Med. 2004;26(4):330-43.                                                                                               | 2004 | Up to July 2002 | NR      | To systematically review the literature concerning the effect of stages-of-change-based interventions in primary care on smoking, physical activity, and dietary behavior in primary care.                                        | Adults (≥ 18 years)  | Health care                                             | RCT, QE                                 | NA                                                                 | NAES                                                                                        | Narrative review  |
| Foster C. Interventions for promoting physical activity. Cochrane Database Syst Rev. 2005;25;(1):CD003180.                                                                                                                | 2005 | 1966 to 2005    | NR      | To assess the effectiveness of interventions designed to promote physical activity in adults aged 16 years and older, not living in an institution.                                                                               | Adults (18-95 years) | Community, health care                                  | RCT                                     | NS                                                                 | ES= SMD= 0.28, 95%CI(0.15-0.41) ; SMD=0.52, 95% CI (0.14-0.90); OR= 1.33 95% CI (1.03-1.72) | Meta-analysis     |
| Matson-Koffman DM. A Site-specific Literature Review of Policy and Environmental Interventions that Promote Physical Activity and Nutrition for Cardiovascular Health: What Works? Am J Health Promot. 2005;19(3):167-93. | 2005 | 1970 to 2003    | NR      | To review the literature to determine whether policy and environmental interventions can increase people's physical activity or improve their nutrition.                                                                          | All                  | Community, health care, schools, workplace, environment | RCT, QE, pre-post-test, cross-sectional | Ireland, Finland, Canada, USA, Switzerland, UK (Scotland, England) | NAES                                                                                        | Narrative review  |
| Hillsdon M. The effectiveness of public health interventions for increasing physical activity among adults: a review of reviews. Evidence briefing (2nd edition). February 2005. Available at www.hda.nhs.uk/evidence     | 2005 | 1996 to 2004    | English | To identify all relevant systematic reviews and metaanalyses of exercise promotion that are limited to interventions that target individual-level change and measure changes in physical activity at the level of the individual. | Adults               | Community, health care, work place                      | Systematic reviews of RCT, QE           | UK, USA, Australia                                                 | NA                                                                                          | Review of reviews |

204

|                                                                                                                                                   |      |              |         |                                                                                                                            |                          |                                     |                                         |                                      |      |                  |
|---------------------------------------------------------------------------------------------------------------------------------------------------|------|--------------|---------|----------------------------------------------------------------------------------------------------------------------------|--------------------------|-------------------------------------|-----------------------------------------|--------------------------------------|------|------------------|
| Blue CL. Synthesis of Intervention Research to Modify Physical Activity and Dietary Behaviors. Res Theory Nurs Pract. 2005;19(1):25-61.           | 2005 | 1993 to 2003 | English | To examine conceptual and methodological issues related to research on physical activity and dietary behaviors.            | Adults (≥ 18 years)      | Community, health care, workplace   | RCT, QE                                 | UK, USA                              | NA   | Narrative review |
| Ashroth NL. Home versus center based physical activity programs in older adults. Cochrane Database Syst Rev. 2005;(1):CD004017.                   | 2005 | 1966-2002    | NR      | To assess the effectiveness of 'home based' versus 'center based' physical activity programs on the health of older adults | Older adults (≥50 years) | Community, home-based, center-based | RCT, QE                                 | USA, Spain, Netherlands              | NAES | Narrative review |
| Morgan O. Approaches to increase physical activity: reviewing the evidence for exercise-referral schemes. Public Health. 2005;119(5):361-70.      | 2005 | 1966 to 2002 | English | To review current evidence of effectiveness for exercise referral schemes.                                                 | Adults (>34 years)       | Health care                         | RCT, QE                                 | USA, UK, New Zealand                 | NAES | Narrative review |
| Finlay SJ. Physical activity promotion through the mass media: Inception, production, transmission and consumption. Prev Med. 2005; 40(2):121-30- | 2005 | 1997 to 2002 | English | To review mass media interventions to promote physical activity from a media studies perspective.                          | All                      | Mass media, community               | QE, pre-post-test, experimental, cohort | USA, UK (England), Canada, Australia | NAES | Narrative review |

|                                                                                                                                                                                                                                                              |      |                |                        |                                                                                                                                                                                      |                     |                                                     |                                            |                                                        |                                                                                                                        |                  |
|--------------------------------------------------------------------------------------------------------------------------------------------------------------------------------------------------------------------------------------------------------------|------|----------------|------------------------|--------------------------------------------------------------------------------------------------------------------------------------------------------------------------------------|---------------------|-----------------------------------------------------|--------------------------------------------|--------------------------------------------------------|------------------------------------------------------------------------------------------------------------------------|------------------|
| Engbers LH. Worksite health promotion programs with environmental changes. <i>Am J Prev Med.</i> 2005;29(1):61-70.                                                                                                                                           | 2005 | 1985 to 2004   | English, German, Dutch | To systematically assess the effectiveness of worksite health promotion programs with environmental modifications, on physical activity, dietary intake, and health risk indicators. | Adults              | Workplace                                           | RCT or CT                                  | NS                                                     | NAES                                                                                                                   | Narrative review |
| Foster C. Interventions that use the environment to encourage physical activity. Evidence review. National Institute for Health and Clinical Excellence, September 2006. September 2006. Available at <a href="http://www.nice.org.uk">www.nice.org.uk</a> . | 2006 | Up to May 2005 | English                | To undertake a review of primary studies of interventions that use the environment to encourage physical activity.                                                                   | Adults (≥ 18 years) | Community, environment, military, workplace, policy | QE, pre-post-test, cross-sectional         | USA, Australia, Finland, UK, Switzerland               | NA                                                                                                                     | Narrative review |
| Heath GH. The Effectiveness of Urban Design and Land Use and Transport Policies and Practices to Increase Physical Activity: A Systematic Review. <i>Journal of Physical Activity and Health.</i> 2006;3, Suppl 1, S55-S76.                                  | 2006 | 1987-2003      | NS                     | To increase physical activity through changing social networks, organizational norms and policies, the physical environment, resources and facilities, and laws.                     | Adults              | Community, environment, policy                      | QE, pre-post-test, cohort, cross-sectional | USA, Canada, Australia, Belgium, UK (England), Germany | Community scale urban design: median ES=161%. Street scale urban design and policies: median ES=35% (IQ range 16%-36%) | Narrative review |

206

|                                                                                                                                                                                                                                                                                                                                                                                                            |      |              |         |                                                                                                                                                                                                                         |                     |                                |                        |                                          |      |                  |
|------------------------------------------------------------------------------------------------------------------------------------------------------------------------------------------------------------------------------------------------------------------------------------------------------------------------------------------------------------------------------------------------------------|------|--------------|---------|-------------------------------------------------------------------------------------------------------------------------------------------------------------------------------------------------------------------------|---------------------|--------------------------------|------------------------|------------------------------------------|------|------------------|
| NICE. Four commonly used methods to increase physical activity: brief interventions in primary care, exercise referral schemes, pedometers and community-based exercise programmes for walking and cycling. Public health guidance, PH2 - Issued: March 2006. Available at: <a href="http://www.nice.org.uk/page.aspx?o=PhysicalActivityandEnvr">www.nice.org.uk/page.aspx?o=PhysicalActivityandEnvr</a> . | 2006 | 1990 to 2005 | NS      | This document constitutes a formal guidance on brief interventions in primary care, pedometers, exercise referral schemes and community-based exercise programmes for walking and cycling to increase physical activity | All                 | Community, health care         | RCT, QE, pre-post-test | NS                                       | NA   | Narrative review |
| Kroeze W. A systematic review of randomized trials on the effectiveness of computer-tailored education on physical activity and dietary behaviors. <i>Ann Behav Med.</i> 2006;31(3):205-23.                                                                                                                                                                                                                | 2006 | 1965 to 2004 | English | To systematically review the scientific literature on computer-tailored physical activity and nutrition education.                                                                                                      | Adults              | Community, health care, church | RCT                    | Netherlands, Belgium, USA, UK, Australia | NAES | Narrative review |
| Tulloch H. Physical activity counseling in primary care: Who has and who should be counseling? <i>Patient Educ Couns.</i> 2006;64(1-3):6-20.                                                                                                                                                                                                                                                               | 2006 | Since 2000   | English | To examine the physical activity counseling literature in primary care in order to identify which intervention provider has been used to date and their relative effectiveness for increasing physical activity.        | Adults (≥ 18 years) | Health care                    | RCT, QE                | NS                                       | NAES | Narrative review |

207  
208  
209

|                                                                                                                                                      |      |                 |                        |                                                                                                                                                                                                                                       |                    |                        |                        |                                     |                                   |                  |
|------------------------------------------------------------------------------------------------------------------------------------------------------|------|-----------------|------------------------|---------------------------------------------------------------------------------------------------------------------------------------------------------------------------------------------------------------------------------------|--------------------|------------------------|------------------------|-------------------------------------|-----------------------------------|------------------|
| Sorensen JB. Exercise on prescription in general practice: A systematic review. <i>Scand J Prim Health Care.</i> 2006;24(2):69-74.                   | 2006 | 1980 to 2005    | English                | To address exercise on prescription using a health technology assessment perspective.                                                                                                                                                 | All                | Health care            | RCT, pre-post-test     | NS                                  | NAES                              | Narrative review |
| Vandelanotte C. Website-delivered physical activity interventions: a review of the literature. <i>Am J Prev Med.</i> 2007;33(1):54-64.               | 2007 | Up to July 2006 | English                | To systematically review the research findings and outcomes of website-delivered physical activity interventions and to identify relationships of intervention attributes with behavioral outcomes.                                   | Adults             | Community              | RCT, QE, pre-post-test | USA, Australia, Canada, Belgium,    | Range SMD=0.13 to 0.67. SMD=0.44. | Narrative review |
| van den Berg MH. Internet-based physical activity interventions: a systematic review of the literature. <i>J Med Internet Res.</i> 2007;30(9(3):e26. | 2007 | Up to July 2006 | English, Dutch, German | To systematically assess the methodological quality and the effectiveness of interventions designed to promote physical activity by means of the Internet as evaluated by randomized controlled trials.                               | Adults (≥18 years) | Community              | RCT                    | USA, Canada, Australia, Netherlands | NAES                              | Narrative review |
| Eakin EG. Telephone interventions for physical activity and dietary behavior change: a systematic review. <i>Am J Prev Med.</i> 2007;32(5):419-34.   | 2007 | 1965 to 2006    | English                | To systematically review the literature on interventions for physical activity and dietary behavior change in which a telephone was the primary method of intervention delivery, with a focus on both internal and external validity. | Adults             | Community, health care | RCT, QE                | USA, Australia, New Zealand         | ES=SMD=0.50; range SMD=0.24-1.19  | Narrative review |

|                                                                                                                                                                                                                                   |      |              |         |                                                                                                                                                                                           |                             |                                                            |                        |                                                            |                                                                                                                                                     |                  |
|-----------------------------------------------------------------------------------------------------------------------------------------------------------------------------------------------------------------------------------|------|--------------|---------|-------------------------------------------------------------------------------------------------------------------------------------------------------------------------------------------|-----------------------------|------------------------------------------------------------|------------------------|------------------------------------------------------------|-----------------------------------------------------------------------------------------------------------------------------------------------------|------------------|
| Campbell KJ. Strategies which aim to positively impact on weight, physical activity, diet and sedentary behaviours in children from zero to five years. A systematic review of the literature. <i>Obes Rev.</i> 2007;8(4):327-38. | 2007 | 1995 to 2006 | English | To assess the effectiveness of interventions designed to prevent obesity, promote healthy eating and/or physical activity and/or to reduce sedentary behaviours in 0-5-year-old children. | Children (0-5 years)        | Community, health care, pre-school, child care, home based | RCT, QE, pre-post-test | USA, Canada, UK, Finland                                   | NAES                                                                                                                                                | Narrative review |
| Bravata DM. Using Pedometers to Increase physical Activity and Improve Health: A systematic review. <i>JAMA.</i> 2007;298(19):2296-304.                                                                                           | 2007 | 1966 to 2007 | English | To evaluate the association of pedometer use with physical activity and health outcomes among outpatient adults.                                                                          | Adults (mean age= 49 years) | Community, health care, work, church                       | RCT, observational     | NS                                                         | Pooled estimate from RCT=2491; 95% CI (1096-3885) steps per day. Pooled estimate from observational studies=2183; 95% CI (1571-2796) steps per day. | Meta-analysis    |
| Norman GJ. A review of eHealth interventions for physical activity and dietary behavior change. <i>Am J Prev Med.</i> 2007;33(4):336-345.                                                                                         | 2007 | 2000 to 2005 | English | To review eHealth intervention studies for adults and children that targeted behavior change for physical activity, healthy eating, or both behaviors.                                    | Children and adults         | Community, health care, workplace, military, schools       | RCT, QE                | Australia, USA, Canada, South Korea, Belgium               | ES range: r= -0.03-0.43                                                                                                                             | Narrative review |
| Ogilvie D. Interventions to promote walking: systematic review. <i>BMJ.</i> 2007;334(7605):1204.                                                                                                                                  | 2007 | 1990 to 2007 | NR      | To assess the effects of interventions to promote walking in individuals and populations.                                                                                                 | Children and adults         | Community, health care, workplace, schools                 | RCT, QE                | USA, Australia, UK (Scotland), Brazil, Netherlands, Canada | ES= range -11-146 minutes/week. Most promising studies ES= 30-60 minutes/week                                                                       | Narrative review |

210

|                                                                                                                                                                                     |      |                  |    |                                                                                                                                                                      |                                                     |                                                        |                                                                   |                                                                                                |                                                                                                           |                  |
|-------------------------------------------------------------------------------------------------------------------------------------------------------------------------------------|------|------------------|----|----------------------------------------------------------------------------------------------------------------------------------------------------------------------|-----------------------------------------------------|--------------------------------------------------------|-------------------------------------------------------------------|------------------------------------------------------------------------------------------------|-----------------------------------------------------------------------------------------------------------|------------------|
| Williams NH. Effectiveness of exercise-referral schemes to promote physical activity in adults: Systematic review. <i>British Journal of General Practice.</i> 2007;57(545):979-86. | 2007 | Up to March 2007 | NR | To assess whether exercise-referral schemes are effective in improving exercise participation in sedentary adults.                                                   | Adults (≥ 16 years)                                 | Health care, community, church                         | RCTs, QE, observational studies, process evaluation, qualitative. | UK, Sweden                                                                                     | Pooled RR= 1.20 (95%CI 1.06 to 1.35).                                                                     | Meta-analysis    |
| van Sluijs EM. Effectiveness of interventions to promote physical activity in children and adolescents: Systematic review of controlled trials. <i>BMJ.</i> 2007;335(7622):703.     | 2007 | Up to 2006       | NR | To review the published literature on the effectiveness of interventions to promote physical activity in children and adolescents.                                   | Children and adolescents (≤18 years)                | School, community, family                              | RCT, QE                                                           | Greece, USA, Ireland, UK, Finland, Canada, Belgium, Netherlands, Australia,                    | ES= 2.6-83 minutes per week of physical education related physical activity of overall physical activity. | Narrative review |
| Salmon J. Promoting physical activity participation among children and adolescents. <i>Epidemiol Rev.</i> 2007;29:144-59.                                                           | 2007 | 1965 to 2006     | NR | To summarize the evidence of the effectiveness of interventions that report physical activity outcomes in children aged 4-12 years and adolescents aged 13-19 years. | Children (4-12 years) and adolescents (13-19 years) | School, health care, community, family, Internet-based | RCT, QE                                                           | USA, Canada, UK, Ireland, Greece, Belgium, Finland, France, Spain, Australia.                  | NAES                                                                                                      | Narrative review |
| Kang M. Effect of Pedometer-Based Physical Activity Interventions: A Meta-Analysis. <i>Physical Education, Recreation and Dance.</i> 2008; 80(3):648-655.                           | 2008 | 2000 to 2007     | NS | To determine the magnitude and direction of effects in pedometer-based interventions.                                                                                | Children, adults and older adults                   | Any                                                    | RCT, QE, Pre-post                                                 | NS                                                                                             | ES=SMD=0.68 (95% CI = 0.55, 0.81) ; average increase in 2,000 steps in the intervention group.            | Meta-analysis    |
| Lee MC. Systematic review of active commuting to school and children's physical activity and weight. <i>J Phys Act Health.</i> 2008;5(6):930-49.                                    | 2008 | Up to 2007       | NR | To evaluate interventions among schoolchildren that promoted the positive effects of active commuting on physical activity and overweight.                           | Children and adolescents                            | Community                                              | Cohort, cross-sectional                                           | Germany, Russia, UK (Scotland), USA, Australia, Denmark, China, Canada, Portugal, Netherlands, | ES= mean: 28 minutes of MVPA per day; range: 4.7 to 45 additional minutes of MVPA per day .               | Narrative review |

211  
212

|                                                                                                                                                                     |      |              |                 |                                                                                                        |                             |                                            |                    |             |                                                                                                                                                                                                                                                                                                       |                  |
|---------------------------------------------------------------------------------------------------------------------------------------------------------------------|------|--------------|-----------------|--------------------------------------------------------------------------------------------------------|-----------------------------|--------------------------------------------|--------------------|-------------|-------------------------------------------------------------------------------------------------------------------------------------------------------------------------------------------------------------------------------------------------------------------------------------------------------|------------------|
|                                                                                                                                                                     |      |              |                 |                                                                                                        |                             |                                            |                    | Philippines |                                                                                                                                                                                                                                                                                                       |                  |
| Sharma M. Physical activity interventions in Hispanic American girls and women. <i>Obes Rev</i> . 2008;9(6):560-71.                                                 | 2008 | 1994 to 2007 | English         | To review physical activity interventions done with Hispanic American girls and women.                 | Girls and Women (>10 years) | Community, Health care, home based, school | RCT, pre-post-test | USA         | NAES                                                                                                                                                                                                                                                                                                  | Narrative review |
| Müller-Riemenschneider. Long-term effectiveness of interventions promoting physical activity: A systematic review. <i>Preventive Medicine</i> . 2008; 47(4):354-368 | 2008 | 2001 to 2007 | English, German | To evaluate the long-term effectiveness of physical activity interventions targeted at healthy adults. | Adults (> 18)               | Community, health care, work place         | RCT                | NS          | ES=increase in 975 kcal/wk in the intervention group. ES= increase of 11% in physical fitness in the intervention group compared with control group. ES= OR to meet PA targets were 3.31 (1.99-5.52) and 1.52 (1.07-2.14) compared to no-intervention and minimal-intervention control, respectively. | Meta-analysis    |

213  
214

|                                                                                                                                                                     |      |              |                               |                                                                                                                                                      |                     |                                                               |                                     |                              |                                        |                  |
|---------------------------------------------------------------------------------------------------------------------------------------------------------------------|------|--------------|-------------------------------|------------------------------------------------------------------------------------------------------------------------------------------------------|---------------------|---------------------------------------------------------------|-------------------------------------|------------------------------|----------------------------------------|------------------|
| Hoehner CM. Physical activity interventions in Latin America: a systematic review. <i>Am J Prev Med</i> . 2008 ;34(3):224-233.                                      | 2008 | 1980 to 2006 | English, Portuguese, Spanish. | To assess the current evidence base concerning interventions to increase physical activity in Latin America.                                         | Children and adults | Community, schools, university, worksite, environment, policy | RCT, pre-post test, cross-sectional | Brazil, Chile, Colombia, USA | ES=percentage net change: -50% to 307% | Narrative review |
| NICE. Promoting and creating built or natural environments that encourage and support physical activity. <i>Public health guidance</i> . PH8 - issued: January 2008 | 2008 | 1990 to 2006 | English                       | To provide information for the formal guidance on promoting and creating built or natural environments that encourage and support physical activity. | All                 | Environment, community                                        | RCT, QE, pre-post, observational    | NS                           | NA                                     | Narrative review |
| Breckon JD. Physical Activity Counseling Content and Competency: A Systematic Review. <i>J Phys Act Health</i> . 2008;5(3):398-417.                                 | 2008 | 1995 to 2006 | English                       | To examine the theory on which the intervention is based and the level of treatment fidelity applied at all stages of the intervention.              | Adults (≥ 16 years) | Health care                                                   | RCT, QE                             | UK, USA                      | NAES                                   | Narrative review |
| Robertson LR. What works with men? A systematic review of health promoting interventions targeting men. <i>BMC Health Serv Res</i> . 2008;8:141.                    | 2008 | 1990 to 2006 | English                       | To appraise the available evidence of effective interventions aimed at improving men's health.                                                       | Adults (≥ 18 years) | Health care                                                   | RCT, QE, pre-post-test              | USA, Australia, New Zealand  | NAES                                   | Narrative review |

215  
216

|                                                                                                                                                                   |      |                                                  |         |                                                                                                                                                                                                                         |                         |                                   |                        |                                               |      |                  |
|-------------------------------------------------------------------------------------------------------------------------------------------------------------------|------|--------------------------------------------------|---------|-------------------------------------------------------------------------------------------------------------------------------------------------------------------------------------------------------------------------|-------------------------|-----------------------------------|------------------------|-----------------------------------------------|------|------------------|
| Flemming P. Lifestyle interventions in primary care: Systematic review of randomized controlled trials. <i>Can Fam Physician</i> . 2008;54(12):1706-13.           | 2008 | 1985 to 2007                                     | English | To determine whether lifestyle counseling interventions delivered in primary care settings by primary care providers to their low-risk adult patients are effective in changing factors related to cardiovascular risk. | Adults (18 to 79 years) | Health care                       | RCT                    | UK (England), New Zealand, Finland, Australia | NAES | Narrative review |
| Carroll JK. Getting patients to exercise more: A systematic review of underserved populations. <i>J Fam Pract</i> . 2008;57(3):170-6, E1-3, 1 p following E3.     | 2008 | 1966 to 2005                                     | English | To assess clinical trials of clinician initiated counseling interventions for promoting physical activity in underserved populations.                                                                                   | Children and adults     | Health care                       | RCT, QE                | USA                                           | NAES | Narrative review |
| Priest N. Interventions implemented through sporting organisations for increasing participation in sport. <i>Cochrane Database Syst Rev</i> . 2008; (3):CD004812. | 2008 | Updated the original 2004 systematic search 2007 | NR      | To determine the effects of interventions implemented through sporting organisations to increase (active and nonactive) participation in organised sport.                                                               | All                     | Multiple                          | RCT, QE, pre-post-test | NS                                            | NA   | Narrative review |
| Williams DM. Interventions to Increase Walking Behavior. <i>Med Sci Sports Exerc</i> . 2008;40(7 Suppl):S567-S573.                                                | 2008 | Since 1980                                       | NS      | To review studies of walking promotion interventions.                                                                                                                                                                   | Adults (> 18)           | Workplace, health care, community | RCT                    | USA, Australia, UK                            | NAES | Narrative review |

217

|                                                                                                                                                                       |      |              |         |                                                                                                                                                                                                      |                                          |                                |                        |                                                                             |                               |                  |
|-----------------------------------------------------------------------------------------------------------------------------------------------------------------------|------|--------------|---------|------------------------------------------------------------------------------------------------------------------------------------------------------------------------------------------------------|------------------------------------------|--------------------------------|------------------------|-----------------------------------------------------------------------------|-------------------------------|------------------|
| Jenkins A. The effectiveness of distance interventions for increasing physical activity: a review. <i>Am J Health Promot</i> . 2009;24(2):102-17.                     | 2009 | 2004 to 2006 | English | Evaluate the effectiveness of distance physical activity interventions.                                                                                                                              | Adults                                   | Any                            | RCT                    | USA, Australia, Canada, UK (Scotland)                                       | ES: range of SMD -0.2 to 0.45 | Narrative review |
| Fjeldsoe BS. Behavior change interventions delivered by mobile telephone short-message service. <i>Am J Prev Med</i> . 2009;36(2):165-73.                             | 2009 | 1990 to 2008 | English | To review the current research examining mobile telephone short-message service for delivering health behavior change interventions via text messages.                                               | Adults                                   | Community                      | RCT, pre-post-test     | UK                                                                          | ES=SMD=0.82                   | Narrative review |
| De Meester F. Interventions for promoting physical activity among European teenagers: a systematic review. <i>Int J Behav Nutr Phys Act</i> . 2009;6:82.              | 2009 | 1995 to 2008 | English | To summarize the effectiveness of interventions to promote physical activity among European teenagers.                                                                                               | Adolescents (mean ages: 10 and 19 years) | Community, health care, school | RCT, QE, pre-post-test | UK (Scotland), Sweden, Greece, Belgium, Ireland, France, Netherlands, Spain | ES=SMD range=-1.06-2.79       | Narrative review |
| Hutchison AJ. Physical Activity Behavior Change Interventions Based on the Trans-theoretical Model: A Systematic Review. <i>Health Educ Behav</i> . 2009;36(5):829-45 | 2009 | 1982 to 2007 | English | To critically examine how the TTM is being applied to develop PA behavior change interventions and to determine whether these TTM-based interventions are effective in promoting PA behavior change. | All                                      | Community, health care         | RCT, QE                | USA, UK, Australia, South Korea                                             | NAES                          | Narrative review |

218  
219



220

|                                                                                                                                                                     |      |                     |         |                                                                                                                                   |                                                      |                                                       |                                     |                                           |                                          |                  |
|---------------------------------------------------------------------------------------------------------------------------------------------------------------------|------|---------------------|---------|-----------------------------------------------------------------------------------------------------------------------------------|------------------------------------------------------|-------------------------------------------------------|-------------------------------------|-------------------------------------------|------------------------------------------|------------------|
| Cobiac LJ. Cost-Effectiveness of Interventions to Promote Physical Activity: A Modelling Study. PLoS Med. 2009;6(7):e1000110.                                       | 2009 | 2001 to 2006        | English | To evaluate the cost-effectiveness of interventions to promote physical activity.                                                 | Adults                                               | Community, health care, environment                   | RCT, QE, meta-analysis              | Australia                                 | ES= target group range: 57-574Met/min/wk | Narrative review |
| Lubans DR. A systematic review of studies using pedometers to promote physical activity among youth. Prev Med. 2009;48(4):307-15                                    | 2009 | Up to December 2008 | English | To identify the effectiveness of pedometers in promoting physical activity among youth.                                           | Children and adolescents (5-18 years)                | Community, health care, school                        | RCT, QE                             | USA, Canada, Australia, New Zealand, UK   | NAES                                     | Narrative review |
| O'Connor TM. Engaging Parents to Increase Youth Physical Activity: A Systematic Review. Am J Prev Med 2009;37(2):141-149.                                           | 2009 | 1980 to 2008        | English | To identify how best to involve parents in physical activity interventions for children.                                          | Children and adolescent                              | Community, health care, school, preschool, home, WIC  | RCT, QE, pre-post-test, pilot study | USA                                       | NAES                                     | Narrative review |
| Whitt-Glover MC. Systematic Review of Interventions to Increase Physical Activity and Physical Fitness in African-Americans. Am J Health Promot. 2009;23(6):S33-56. | 2009 | 1985 to 2006        | NS      | To identify characteristics of effective interventions designed to increase physical activity or fitness among African-Americans. | Children (7 to 17 years) and adults (18 to 91 years) | Community, health care, schools, churches, workplace. | RCT, QE, UCT                        | USA                                       | NAES                                     | Narrative review |
| Michie S. Effective techniques in healthy eating and physical activity interventions: a meta-regression. Health Psychol. 2009;28(6):690-701.                        | 2009 | 1990 to 2008        | English | To assess the effectiveness of active behavior change interventions designed to promote physical activity and healthy eating.     | Adults (≥ 18 years)                                  | Community, health care, work place                    | RCT, QE                             | UK, USA, Australia, Canada, Europe, Japan | ES=SMD: 0.31 (95% CI 0.26-0.38).         | Meta-analysis    |

221  
222

|                                                                                                                                                            |      |              |         |                                                                                                                                                                                        |                                       |                                             |                                                  |                                                                                   |                                   |                  |
|------------------------------------------------------------------------------------------------------------------------------------------------------------|------|--------------|---------|----------------------------------------------------------------------------------------------------------------------------------------------------------------------------------------|---------------------------------------|---------------------------------------------|--------------------------------------------------|-----------------------------------------------------------------------------------|-----------------------------------|------------------|
| Neville LM. Computer-tailored physical activity behavior change interventions targeting adults: a systematic review. Int J Behav Nutr Phys Act. 2009;6:30. | 2009 | 1996 to 2008 | English | To provide a narrative systematic review describing the range of evidence on 'second' and 'third' generation computer-tailored primary prevention interventions for physical activity. | Adults                                | Community, health care, workplace, military | RCT, QE                                          | Australia, USA, UK, Belgium, New Zealand                                          | NAES                              | Narrative review |
| Rhodes RE. A Review and Meta-Analysis of Affective Judgments and Physical Activity in Adult Populations. Ann Behav Med. 2009;38(3):180-204.                | 2009 | 1989 to 2009 | English | To review affective judgment constructs employed in physical activity research to assess the relationship with behavior.                                                               | Adults (≥ 18 years)                   | Community, health care., university         | RCT, QE, cohort, pre-post-test, cross-sectional. | Australia, Canada, China, Europe, United States, New Zealand                      | ES= r: 0.42 (95% CI 0.37 to 0.46) | Meta-analysis    |
| Brown AS. Promoting physical activity amongst adolescent girls. Issues Compr Pediatr Nurs. 2009;32(2):49-64.                                               | 2009 | 1994 to 2009 | English | To review studies investigating physical activity interventions designed specifically for adolescent girls.                                                                            | Adolescent girls (9-19 years)         | Community, school, church, home.            | RCT, QE                                          | USA, Canada, Sweden, Australia                                                    | NAES                              | Narrative review |
| Faulkner GAJ. Active school transport, physical activity levels and body weight of children and youth: A systematic review. Prev Med. 2009;48(1):3-8.      | 2009 | 1945 to 2008 | English | To conduct a systematic review to assess if children who actively commute to school more physically active than children who travel by motorized transport.                            | Children and adolescents (5-18 years) | Community, schools                          | Cross-sectional, cohort                          | UK (Scotland, England), Denmark, Cyprus, USA, Philippines, Australia, New Zealand | NAES                              | Narrative review |

223

|                                                                                                                                                                                             |      |                 |         |                                                                                                                                                            |                                       |                           |                     |                                                                                                                  |                                 |                  |
|---------------------------------------------------------------------------------------------------------------------------------------------------------------------------------------------|------|-----------------|---------|------------------------------------------------------------------------------------------------------------------------------------------------------------|---------------------------------------|---------------------------|---------------------|------------------------------------------------------------------------------------------------------------------|---------------------------------|------------------|
| NICE. Promoting physical activity, active play and sport for pre-school and school-age children and young people in family, pre-school, school and community settings.                      | 2009 | 1990 to 2007    | English | To increase the number of children and young people who regularly walk, cycle and use other modes of physically active travel.                             | Children and adolescents (<19 years)  | Family, school, community | Systematic reviews. | USA, UK (England)                                                                                                | NA                              | Narrative review |
| Krishna S. Healthcare via cell phones: a systematic review. <i>Telemed J E Health.</i> 2009;15(3):231-40.                                                                                   | 2009 | 1950 to 2008    | NR      | To evaluate the empirical evidence related to the role of cell phones and text messaging interventions in improving health outcomes and processes of care. | Children and adults                   | Health care               | RCT, QE             | USA, Australia, UK, South Korea, New Zealand, Spain, Austria, China, Croatia, Italy, France, Netherlands, Norway | NAES                            | Narrative review |
| Beets MW. After-school program impact on physical activity and fitness. A meta-analysis. <i>Am J Prev Med.</i> 2009;36(6):527-37.                                                           | 2009 | 1980 to 2008    | English | To summarize the research regarding the effectiveness of after school programs in increasing physical activity.                                            | Children and adolescents (<18 years)  | School                    | RCT, QE             | USA, Australia, Spain                                                                                            | ES=SMD: 0.44 (95% CI 0.28-0.60) | Meta-analysis    |
| Dobbins M. School-based physical activity programs for promoting physical activity and fitness in children and adolescents aged 6-18. <i>Cochrane Database Syst Rev.</i> 2009;(1):CD007651. | 2009 | Up to July 2007 | NR      | To summarize the evidence of the effectiveness of school-based interventions in promoting physical activity and fitness in children and adolescents.       | Children and adolescents (6-18 years) | School                    | RCT, QE, cohort     | USA, France, Norway, Belgium, Germany, Greece, Australia, Russia.                                                | NAES                            | Narrative review |

224

|                                                                                                                                                                                                            |      |              |         |                                                                                                                                                  |                            |                                                        |                                       |                                                                     |                                                                                                                                                                             |                   |
|------------------------------------------------------------------------------------------------------------------------------------------------------------------------------------------------------------|------|--------------|---------|--------------------------------------------------------------------------------------------------------------------------------------------------|----------------------------|--------------------------------------------------------|---------------------------------------|---------------------------------------------------------------------|-----------------------------------------------------------------------------------------------------------------------------------------------------------------------------|-------------------|
| Conn VS. Meta-Analysis of workplace physical activity interventions. <i>Am J Prev Med</i> 2009;37(4):330-9                                                                                                 | 2009 | 1969 to 2007 | English | To integrate the extant wide range of worksite physical activity intervention research                                                           | Adults                     | Workplace                                              | RCT, QE, pre-post-test, otros revisar | US, Australia, New Zealand                                          | ES=SMD:0.21, 95% CI (0.11-0.31)                                                                                                                                             | Meta-analysis     |
| Johnson BT. Meta-synthesis of health behavior change meta-analyses. <i>Am J Public Health.</i> 2010;100(11):2193-8.                                                                                        | 2010 | 1972 to 2003 | English | To compare meta-analytic findings across diverse behavioral interventions to characterize how well they have achieved change in health behavior. | Adults                     | Community, health care                                 | Meta-analysis                         | NS                                                                  | ES=SMD:0.22, 95% CI (0.20, 0.23)                                                                                                                                            | Review of reviews |
| Krebs P. A meta-analysis of computer-tailored interventions for health behavior change. <i>Prev Med.</i> 2010;51(3-4):214-21.                                                                              | 2010 | 1988 to 2009 | English | To use meta-analytic techniques to assess the mean effect for computer-tailored interventions on four health behaviors.                          | Children and adults        | Community, health care, workplace, school              | RCT, QE                               | USA, New Zealand, Australia, Europe                                 | ES=SMD: 0.16, 95% CI=(0.10-0.21)                                                                                                                                            | Meta-analysis     |
| Ashford S. What is the best way to change self-efficacy to promote lifestyle and recreational physical activity? A systematic review with meta-analysis. <i>Br J Health Psychol.</i> 2010;15(Pt 2):265-88. | 2010 | 1966 to 2007 | English | To conduct a meta-analysis of the effectiveness of interventions to alter self-efficacy, in the context of physical activity interventions.      | Adults (Mean age=43 years) | Community, health care, workplace, college/university, | RCT, QE, pre-post-test                | Australia, New Zealand, UK, USA                                     | ES=SMD for self-efficacy :0.16, IC95% (0.08-0.25)                                                                                                                           | Meta-analysis     |
| Yang L. Interventions to promote cycling: systematic review. <i>BMJ.</i> 2010;341:c5293.                                                                                                                   | 2010 | Up to 2010   | NR      | To determine what interventions are effective in promoting cycling.                                                                              | Children and adults        | Community, school, work place                          | RCT, QE, observational                | USA, UK (England), Australia, Denmark, Netherlands, Sweden, Germany | ES= net increases of up to 3.4 percentage points in the population prevalence of cycling or the proportion of trips made by bicycle. Net effect equating to an average of 8 | Narrative review  |

|                                                                                                                                                                                                                                                                                                               |      |              |         |                                                                                                                                                               |                     |                    |                                 |                                                                                              |                                                                                                                                                                                         |                  |
|---------------------------------------------------------------------------------------------------------------------------------------------------------------------------------------------------------------------------------------------------------------------------------------------------------------|------|--------------|---------|---------------------------------------------------------------------------------------------------------------------------------------------------------------|---------------------|--------------------|---------------------------------|----------------------------------------------------------------------------------------------|-----------------------------------------------------------------------------------------------------------------------------------------------------------------------------------------|------------------|
|                                                                                                                                                                                                                                                                                                               |      |              |         |                                                                                                                                                               |                     |                    |                                 |                                                                                              | additional cycling trips per person per year.                                                                                                                                           |                  |
| Pucher J. Infrastructure, programs, and policies to increase bicycling: an international review. <i>Prev Med.</i> 2010;50 Suppl 1:S106-25.                                                                                                                                                                    | 2010 | 1990 to 2010 | English | To assess existing research on the effects of various interventions on levels of bicycling.                                                                   | Children and adults | Community, Schools | QE, observational, case studies | Canada, USA, Denmark, Germany, Netherlands, Spain, France, UK, Australia, Japan, Colombia    | NAES                                                                                                                                                                                    | Narrative review |
| Lin JS. Behavioral Counseling to Promote Physical Activity and a Healthful Diet to Prevent Cardiovascular Disease in Adults: Update of the Evidence for the U.S. Preventive Services Task Force. Evidence Synthesis No. 79. Agency for Healthcare Research and Quality (US). 2010; Report No.: 11-05149-EF-1. | 2010 | 2001 to 2009 | English | To assist the U.S. Preventive Services Task Force (USPSTF) in updating its 2002 and 2003 recommendations on counseling to improve physical activity and diet. | Adults              | Health care        | RCT, QE                         | UK, New Zealand, Sweden, USA, Japan, Canada, Finland, Netherlands, Spain, Australia, Belgium | ES=SMD= self reported PA: 0.16; 95%CI (0.10-0.22); RR: 1.23 95% CI (1-12-1.34); Minutes increased of PA per week: 38 minutes/wk; 95% CI (25.9-50.7) for medium intensity interventions. | Meta-analysis    |

225

|                                                                                                                                                                            |      |              |                                                                      |                                                                                                                                                                                                     |                                |                                                                                                                               |                                                        |                                                         |                                               |                  |
|----------------------------------------------------------------------------------------------------------------------------------------------------------------------------|------|--------------|----------------------------------------------------------------------|-----------------------------------------------------------------------------------------------------------------------------------------------------------------------------------------------------|--------------------------------|-------------------------------------------------------------------------------------------------------------------------------|--------------------------------------------------------|---------------------------------------------------------|-----------------------------------------------|------------------|
| Ruppar TM. Interventions to promote physical activity in chronically ill adults: Practice implications of clinical studies. <i>Am J Nurs.</i> 2010;110(7):30-7; quiz 38-9. | 2010 | Up to 2008   | NS                                                                   | To discuss the implications of those findings, describing the strategies and practices commonly used to promote physical activity in chronic illness and identifying those that are most effective. | Adults                         | Health care                                                                                                                   | Meta-analysis                                          | NS                                                      | ES= 945 steps per day; 48 minutes/wk          | Narrative review |
| Webb, TL. Using the Internet to Promote Health Behavior Change: A Systematic Review. <i>J Med Internet A43Res.</i> 2010. 12(1): e4.                                        | 2010 | 2000 to 2008 | English                                                              | To investigate which characteristics of internet-based interventions best promote health behavior change                                                                                            | Internet-based                 | NS                                                                                                                            | RCT                                                    | NS                                                      | ES=SMD=0.24                                   | Meta-analysis    |
| Nocon M. Increasing physical activity with point-of-choice prompts: a systematic review. <i>Scandinavian Journal of Public Health</i> 2010; 38(6): 633-638                 | 2010 | 2001 to 2008 | English                                                              | To assess the effectiveness of point-of-choice prompts for the promotion of stair climbing.                                                                                                         | All                            | University, public transport stations, shopping malls, library, hospital, airport, parking garage, bank, and office buildings | Point of choice intervention to promote stair climbing | UK, USA, Australia, Hong Kong, Denmark                  | ES= increased: 0.3%-10.6%; OR range:1.05-2.93 | Narrative review |
| Chau JY. Are workplace interventions to reduce sitting effective? A systematic review. <i>Prev Med.</i> 2010;51(5):352-6.                                                  | 2010 | Up to 2009   | English, Chinese, Dutch, French, German, Italian, Norwegian, Spanish | To systematically review the effectiveness of worksite interventions for reducing sitting.                                                                                                          | Adults (mean ages 39-45 years) | Workplace                                                                                                                     | RCT, QE, pre-post-test                                 | Finland, Australia, Spain, UK, Belgium, Norway, Canada. | NA                                            | Narrative review |

226

227

|                                                                                                                                                                                                            |      |              |         |                                                                                                                                        |                                             |                                             |                                          |                                                                                                       |                |                   |
|------------------------------------------------------------------------------------------------------------------------------------------------------------------------------------------------------------|------|--------------|---------|----------------------------------------------------------------------------------------------------------------------------------------|---------------------------------------------|---------------------------------------------|------------------------------------------|-------------------------------------------------------------------------------------------------------|----------------|-------------------|
| Fjeldsoe B. Systematic review of maintenance of behavior change following physical activity and dietary interventions. <i>Health Psychol.</i> 2011;30(1):99-109.                                           | 2011 | 2000 to 2009 | English | To review the evidence for maintenance of physical activity and/or dietary behavior change following intervention (follow-up).         | Adults                                      | Any                                         | RCT                                      | Germany, USA, Netherlands, Switzerland, UK (Scotland), Australia, Canada                              | NA             | Narrative review  |
| Baker PR. Community wide interventions for increasing physical activity. <i>Cochrane Database Syst Rev.</i> 2011;(4):CD008366.                                                                             | 2011 | 1995 to 2009 | NR      | To evaluate the effects of community wide, multi-strategic interventions upon population levels of physical activity.                  | Adults                                      | Community                                   | RCT, QE, cohort, interrupted time series | Australia, USA, China, Iran, Pakistan, Belgium, Norway, Netherlands, Finland, Canada, Denmark, France | NAES           | Narrative review  |
| van Sluijs EM. The effect of community and family interventions on young people's physical activity levels: a review of reviews and updated systematic review. <i>Br J Sports Med.</i> 2011;45(11):914-22. | 2011 | 2007 to 2010 | NR      | To review the effectiveness of interventions to promote PA in children and adolescents, delivered in the family and community setting. | Children and adolescents ( $\leq 18$ years) | Community                                   | RCT, QE                                  | NS                                                                                                    | NAES           | Review of reviews |
| Perez A. Review of Intervention Studies Promoting Physical Activity in Hispanic Women. <i>West J Nurs Res.</i> 2010; 32(3): 341-362.                                                                       | 2011 | 1980 to 2010 | English | To provide a comprehensive review and evaluation of intervention studies designed to promote physical activity among Hispanic women.   | Women (24-70 years)                         | Community, health care, schools, home-based | RCT, participatory action research       | USA                                                                                                   | ES=0.21 to 1.4 | Narrative review  |

228

|                                                                                                                                                                                                                  |      |              |         |                                                                                                                                                                                         |                               |                                                                   |                        |    |                                                                                                                                                                                                         |                               |
|------------------------------------------------------------------------------------------------------------------------------------------------------------------------------------------------------------------|------|--------------|---------|-----------------------------------------------------------------------------------------------------------------------------------------------------------------------------------------|-------------------------------|-------------------------------------------------------------------|------------------------|----|---------------------------------------------------------------------------------------------------------------------------------------------------------------------------------------------------------|-------------------------------|
| Conn VS. Interventions to increase physical activity among healthy adults: meta-analysis of outcomes. <i>Am J Public Health.</i> 2011 Apr;101(4):751-8.                                                          | 2011 | 1960 to 2007 | English | To summarize the effects of interventions designed to increase physical activity among healthy adults.                                                                                  | Adults                        | Community, health care, work place                                | RCT, QE                | NS | ES= SMD=0.19<br>95% CI(-0.14-0.53);<br>minutes/wk=14.7<br>95 % CI (-11-40.3)<br>minutes per week.                                                                                                       | Meta-analysis                 |
| Williams SL. What are the most effective intervention techniques for changing physical activity self-efficacy and physical activity behaviour—and are they the same?. <i>Health Educ Res.</i> 2011;26(2):308-22. | 2011 | 1966 to 2007 | English | To estimate the association between specific intervention techniques used in physical activity interventions and change obtained in both self-efficacy and physical activity behaviour. | Adults (Mean age 43.17 years) | Community, health care, workplace, college/university, home-based | RCT, QE, pre-post-test | NS | ES SMD= physical activity self-efficacy = 0.16, 95% CI ( 0.08–0.24); SMD physical activity behaviour=0.21, 95% CI (0.11-0.31)                                                                           | Meta-analysis                 |
| Webb OJ. A statistical summary of mall-based stair-climbing interventions. <i>J Phys Act Health.</i> 2011;8(4):558-65.                                                                                           | 2011 | 1970 to 2008 | English | To summarize the effectiveness of mall-based stair-climbing interventions, while controlling for, and examining, potential moderators of stair/escalator choice.                        | All                           | Environment                                                       | QE                     | UK | ES intervention vs baseline= OR=2.09, 95% CI (1.8–2.4)                                                                                                                                                  | Meta-analysis-pooled analysis |
| Greaves C. Systematic review of reviews of intervention components associated with increased effectiveness in dietary and physical activity interventions. <i>BMC Public Health.</i> 2011;11:119.                | 2011 | 1998 to 2008 | English | To identify intervention components that are associated with increased change in diet and/or physical activity in individuals at risk of type 2 diabetes.                               | Adults ( $\geq 18$ years)     | Multiple                                                          | Systematic reviews     | NS | ES=increased physical activity= 30-60 minutes of walking per week at 12-18 months; SMD around=0.30. Range of SMD of included studies= 0.28 95% CI (0.12-0.41) to 0.52 95% CI (0.14-0.90). OR 1.2 to 1.3 | Review of reviews             |

229

|                                                                                                                                                                                                                                              |      |                    |                  |                                                                                                                                                                                      |                                       |               |                               |                                                         |                                                                                                          |                  |
|----------------------------------------------------------------------------------------------------------------------------------------------------------------------------------------------------------------------------------------------|------|--------------------|------------------|--------------------------------------------------------------------------------------------------------------------------------------------------------------------------------------|---------------------------------------|---------------|-------------------------------|---------------------------------------------------------|----------------------------------------------------------------------------------------------------------|------------------|
| Gourlan MJ. Interventions promoting physical activity among obese populations: a meta-analysis considering global effect, long-term maintenance, physical activity indicators and dose characteristics. <i>Obes Rev.</i> 2011;12(7):e633-45. | 2011 | 1996 to 2010       | English          | To determine the global effect that interventions promoting PA among obese populations have on their PA behaviour                                                                    | All                                   | Multiple      | RCT, QE                       | NS                                                      | ES= mean 0.54 (95% CI=0.39, 0.69))                                                                       | Meta-analysis    |
| Durand CP. A systematic review of built environment factors related to physical activity and obesity risk: implications for smart growth urban planning. <i>Obes Rev.</i> 2011;12(5):e173-82.                                                | 2011 | 1990 to 2009       | English          | To utilize existing built environment research on factors that have been used in smart growth planning to determine whether they are associated with physical activity or body mass. | Children and adults                   | Other sectors | Cross-sectional, cohort study | Australia, Canada, Belgium                              | NAES                                                                                                     | Narrative review |
| Medina-Blanco RI. Intervention programs to promote physical activity in school children: systematic review. <i>Nutr Hosp.</i> 2011;26(2):265-70.                                                                                             | 2011 | 2000 to 2010       | English, Spanish | To assess physical activity promotion programs in school children from 6 to 12 years old.                                                                                            | Children (6-12 years)                 | School        | RCT, QE                       | USA, Belgium, Denmark, Sweden, Canada, Australia, Spain | NAES                                                                                                     | Narrative review |
| Chilón P. A systematic review of interventions for promoting active transportation to school. <i>Int J Behav Nutr Phys Act.</i> 2011;8:10.                                                                                                   | 2011 | Up to January 2010 | English          | To review intervention studies related to active school transportation to guide future intervention research.                                                                        | Children and adolescents (6-18 years) | School        | RCT, QE, pre-post-test        | USA, Australia, UK                                      | ES= SMD range= 0.07-1.21. Increase in the percentage of active transportation to school range 3% to 64%. | Narrative review |

230

|                                                                                                                                                                                                       |      |              |         |                                                                                                                                          |                                       |                                 |         |                                   |                                       |                   |
|-------------------------------------------------------------------------------------------------------------------------------------------------------------------------------------------------------|------|--------------|---------|------------------------------------------------------------------------------------------------------------------------------------------|---------------------------------------|---------------------------------|---------|-----------------------------------|---------------------------------------|-------------------|
| Kriemler S. Effect of school-based interventions on physical activity and fitness in children and adolescents: a review of reviews and systematic update. <i>Br J Sports Med.</i> 2011;45(11):923-30. | 2011 | 2007 to 2010 | NR      | To summarise recent reviews that aimed to increase PA or fitness in youth and carry out a systematic review of new intervention studies. | Children and adolescents (6-18)       | School                          | RCT, QE | USA, Canada, Europe, Brazil, Iran | 47%-65% of the studies were effective | Review of reviews |
| Hamel LM. Computer- and web-based interventions to increase preadolescent and adolescent physical activity: a systematic review. <i>J Adv Nurs.</i> 2011;67(2):251-68.                                | 2011 | 1998 to 2010 | English | To examine evidence regarding computer- or web-based interventions to increase preadolescent and adolescent physical activity.           | Children and adolescents (8-18 years) | School, scout-troop, home, camp | RCT, QE | USA, Belgium                      | NAES                                  | Narrative review  |

RCT= Randomized controlled trials. QE=Quasi-experimental design. UCT= uncontrolled trial. NA= Not available. NS= none specified. NR=No restriction on language was reported in the search strategy. ES= Effect size estimates. SMD= standardized mean difference. NAES=results from studies were presented but a summary of pooled or a range of comparable effect size estimates from all evaluated studies were not available due to different measurement scales. IQ range= interquartile range. MVPA= moderate to vigorous physical activity. USA= United States of America. UK=United Kingdom. ES= Effect estimates, OR: odd ratio. TTM=Trans theoretical Model.
